# Supplementary material for: Lasting and self-healing superhydrophobic surfaces by coating of polystyrene/SiO2 nanoparticles and polydimethylsiloxane
Source: Royal Society of Chemistry journal article supplement (doi:10.1039/c4ta02396j), 2014-01-01
Supplement: c4ta02396j1.pdf [file c4ta02396j1.pdf]

## Electronic Supplementary Information

### Lasting and Self-Healing Superhydrophobic Surfaces by Coating of Polystyrene/SiO<sub>2</sub> Nanoparticles and Polydimethylsiloxane

Chao-Hua Xue<sup>\*a,b</sup>, Zhi-Dong Zhang<sup>a</sup>, Jing Zhang<sup>a</sup>, and Shun-Tian Jia<sup>a</sup>

*a* College of Resource and Environment, Shaanxi University of Science and Technology, Xi'an 710021, China.

*b* Shaanxi Research Institute of Agricultural Products Processing Technology, Shaanxi University of Science and Technology, Xi'an 710021, China.

E-mail: xuech@zju.edu.cn

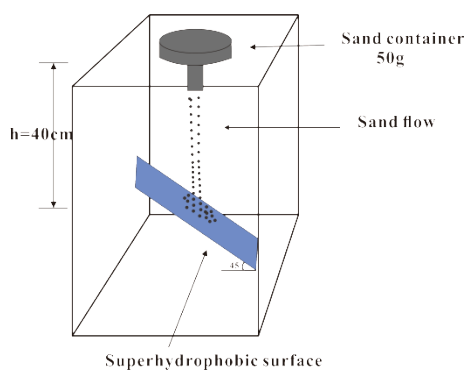

**Fig. S1.** Illustration of sand abrasion

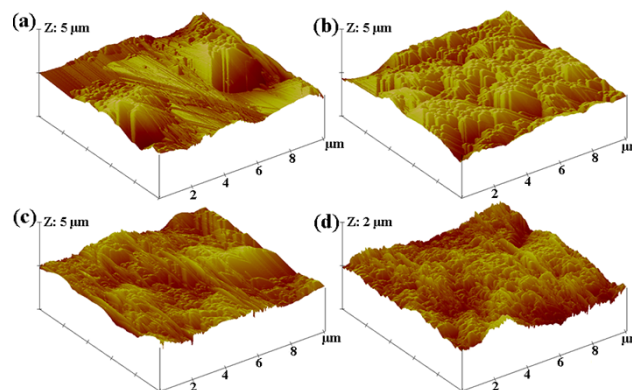

**Fig. S2.** AFM 3D topography images of S-15 coatings after different sand impact times: (a) original, (b) impact 1 time, (c) impact 10 times, and (d) impact 20 times.

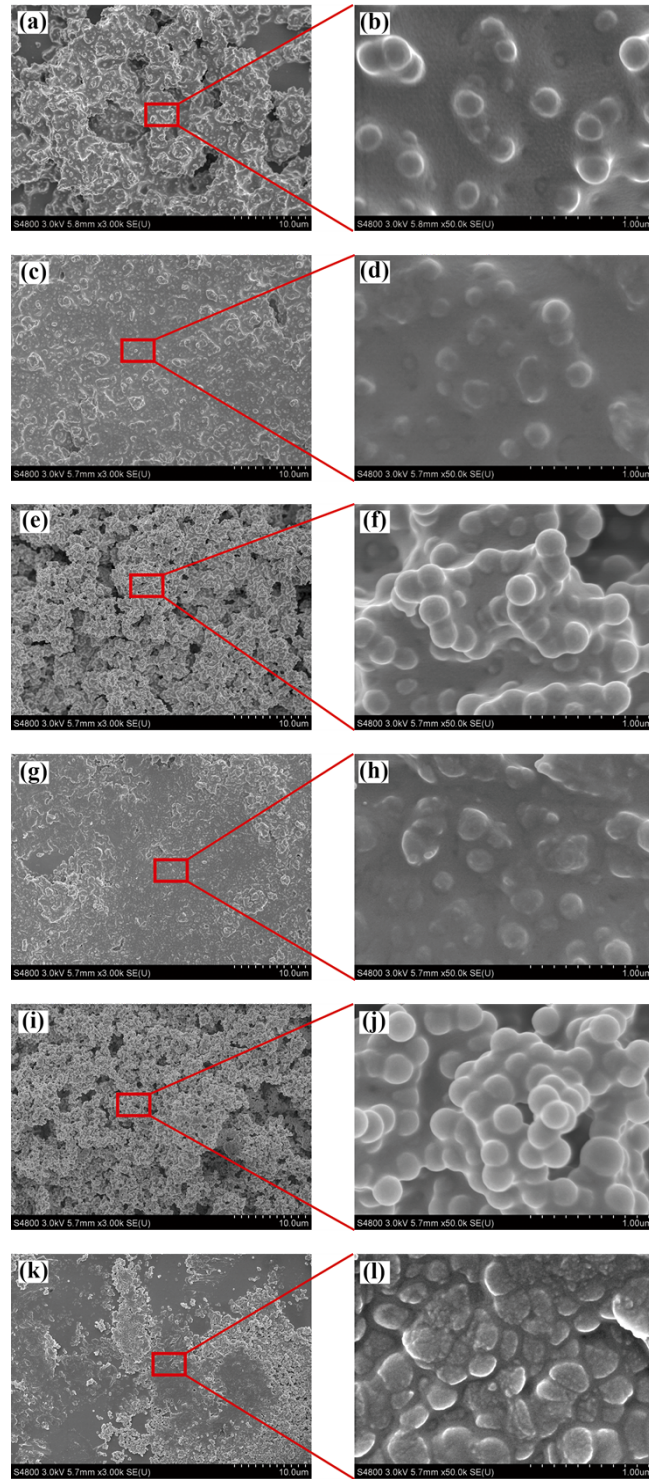

**Fig. S3.** SEM images of S-5: (a) original; (b) higher magnification of (a); (c) impacted 3 times; (d) higher magnification of (c); S-10: (e) original; (f) higher magnification of (e); (g) impacted 10 times; (h) higher magnification of (g); S-20: (i) original; (j) higher magnification of (i); (k) impacted 10 times; (l) higher magnification of (k).
